# Supplementary material
Source: PubMed Central journal article supplement (PMC4724489)
Supplement: NIHMS741963-supplement-1.pdf [file NIHMS741963-supplement-1.pdf]

**Supplemental Table S1. Strains used in this study**

| Yeast strain        | Genotype                                                                                                                                                                                                                                                                                           | source                |
|---------------------|----------------------------------------------------------------------------------------------------------------------------------------------------------------------------------------------------------------------------------------------------------------------------------------------------|-----------------------|
| yJM0597/<br>YEF473B | <i>MAT<math>\alpha</math> ura3-52 lys2-801 leu2-<math>\Delta</math>1 his3-<math>\Delta</math>200 trp1-<math>\Delta</math>63</i>                                                                                                                                                                    | (Amberg et al., 1997) |
| yJM0120             | <i>MAT<math>\alpha</math> tub3<math>\Delta</math>::HIS3MX6 ura3-52 lys2-801 leu2-<math>\Delta</math>1 his3-<math>\Delta</math>200 trp1-<math>\Delta</math>63</i>                                                                                                                                   | This study            |
| yJM0313             | <i>MAT<math>\alpha</math> BIK1-3GFP::TRP1 ura3-52 lys2-801 leu2-<math>\Delta</math>1 his3-<math>\Delta</math>200 trp1-<math>\Delta</math>63</i>                                                                                                                                                    | This study            |
| yJM0314             | <i>MAT<math>\alpha</math> BIK1-3GFP::TRP1 ura3-52 lys2-801 leu2-<math>\Delta</math>1 his3-<math>\Delta</math>200 trp1-<math>\Delta</math>63</i>                                                                                                                                                    | This study            |
| yJM0594             | <i>MAT<math>\alpha</math> dyn1<math>\Delta</math>::HIS3 ura3-52 lys2-801 leu2-<math>\Delta</math>1 his3-<math>\Delta</math>200 trp1-<math>\Delta</math>63</i>                                                                                                                                      | This study            |
| yJM0663             | <i>MAT<math>\alpha</math> bim1<math>\Delta</math>::HIS3 ura3-52 lys2-801 leu2-<math>\Delta</math>1 his3-<math>\Delta</math>200 trp1-<math>\Delta</math>63</i>                                                                                                                                      | This study            |
| yJM0680             | <i>MAT<math>\alpha</math> tub1-N103D+280::KanMX ura3-52 lys2-801 leu2-<math>\Delta</math>1 his3-<math>\Delta</math>200 trp1-<math>\Delta</math>63</i>                                                                                                                                              | This study            |
| yJM0681             | <i>MAT<math>\alpha</math> tub1-N103D+280::KanMX ura3-52 lys2-801 leu2-<math>\Delta</math>1 his3-<math>\Delta</math>200 trp1-<math>\Delta</math>63</i>                                                                                                                                              | This study            |
| yJM0682             | <i>MAT<math>\alpha</math> tub1-N103D+280::KanMX ura3-52 lys2-801 leu2-<math>\Delta</math>1 his3-<math>\Delta</math>200 trp1-<math>\Delta</math>63</i>                                                                                                                                              | This study            |
| yJM0714             | <i>MAT<math>\alpha</math> tub1-N103D+280::KanMX tub3-N103D+150::hygB ura3-52 lys2-801 leu2-<math>\Delta</math>1 his3-<math>\Delta</math>200 trp1-<math>\Delta</math>63</i>                                                                                                                         | This study            |
| yJM0813             | <i>MAT<math>\alpha</math> yke2<math>\Delta</math>::HIS ura3-52 lys2-801 leu2-<math>\Delta</math>1 his3-<math>\Delta</math>200 trp1-<math>\Delta</math>63</i>                                                                                                                                       | This study            |
| yJM0814             | <i>MAT<math>\alpha</math> rbl2<math>\Delta</math>::HIS ura3-52 lys2-801 leu2-<math>\Delta</math>1 his3-<math>\Delta</math>200 trp1-<math>\Delta</math>63</i>                                                                                                                                       | This study            |
| yJM0816             | <i>MAT<math>\alpha</math> gim3<math>\Delta</math>::HIS ura3-52 lys2-801 leu2-<math>\Delta</math>1 his3-<math>\Delta</math>200 trp1-<math>\Delta</math>63</i>                                                                                                                                       | This study            |
| yJM0817             | <i>MAT<math>\alpha</math> cin1<math>\Delta</math>::HIS ura3-52 lys2-801 leu2-<math>\Delta</math>1 his3-<math>\Delta</math>200 trp1-<math>\Delta</math>63</i>                                                                                                                                       | This study            |
| yJM0819             | <i>MAT<math>\alpha</math> cin2<math>\Delta</math>::HIS ura3-52 lys2-801 leu2-<math>\Delta</math>1 his3-<math>\Delta</math>200 trp1-<math>\Delta</math>63</i>                                                                                                                                       | This study            |
| yJM0960             | <i>MAT<math>\alpha</math> cin4<math>\Delta</math>::HIS3 ura3-52 lys2-801 leu2-<math>\Delta</math>1 his3-<math>\Delta</math>200 trp1-<math>\Delta</math>63</i>                                                                                                                                      | This study            |
| yJM1087             | <i>MAT<math>\alpha</math> alf1<math>\Delta</math>::HIS3MX6 ura3-52 lys2-801 leu2-<math>\Delta</math>1 his3-<math>\Delta</math>200 trp1-<math>\Delta</math>63</i>                                                                                                                                   | This study            |
| yJM1088             | <i>MAT<math>\alpha</math> pac2<math>\Delta</math>::HIS3MX6 ura3-52 lys2-801 leu2-<math>\Delta</math>1 his3-<math>\Delta</math>200 trp1-<math>\Delta</math>63</i>                                                                                                                                   | This study            |
| yJM1336             | <i>MAT<math>\alpha</math>/<math>\alpha</math> TUB1-GFP::LEU2/TUB1-GFP::LEU2 ura3-52/ura3-52 lys2-801/lys2-801 leu2-<math>\Delta</math>1/leu2-<math>\Delta</math>1 his3-<math>\Delta</math>200/his3-<math>\Delta</math>200 trp1-<math>\Delta</math>63 /trp1-<math>\Delta</math>63</i>               | This study            |
| yJM1337             | <i>MAT<math>\alpha</math>/<math>\alpha</math> TUB1-GFP::LEU2/TUB1-GFP::LEU2 ura3-52/ura3-52 lys2-801/lys2-801 leu2-<math>\Delta</math>1/leu2-<math>\Delta</math>1 his3-<math>\Delta</math>200/his3-<math>\Delta</math>200 trp1-<math>\Delta</math>63 /trp1-<math>\Delta</math>63</i>               | This study            |
| yJM1338             | <i>MAT<math>\alpha</math>/<math>\alpha</math> TUB1-GFP::LEU2/TUB1 ura3-52/ura3-52 lys2-801/lys2-801 leu2-<math>\Delta</math>1/leu2-<math>\Delta</math>1 his3-<math>\Delta</math>200/his3-<math>\Delta</math>200 trp1-<math>\Delta</math>63 /trp1-<math>\Delta</math>63</i>                         | This study            |
| yJM1339             | <i>MAT<math>\alpha</math>/<math>\alpha</math> TUB1-GFP::LEU2/TUB1 ura3-52/ura3-52 lys2-801/lys2-801 leu2-<math>\Delta</math>1/leu2-<math>\Delta</math>1 his3-<math>\Delta</math>200/his3-<math>\Delta</math>200 trp1-<math>\Delta</math>63 /trp1-<math>\Delta</math>63</i>                         | This study            |
| yJM1340             | <i>MAT<math>\alpha</math>/<math>\alpha</math> TUB1-GFP::LEU2/tub1-N103D+280::KanMX6 ura3-52/ura3-52 lys2-801/lys2-801 leu2-<math>\Delta</math>1/leu2-<math>\Delta</math>1 his3-<math>\Delta</math>200/his3-<math>\Delta</math>200 trp1-<math>\Delta</math>63 /trp1-<math>\Delta</math>63</i>       | This study            |
| yJM1341             | <i>MAT<math>\alpha</math>/<math>\alpha</math> TUB1-GFP::LEU2/tub1-N103D+280::KanMX6 ura3-52/ura3-52 lys2-801/lys2-801 leu2-<math>\Delta</math>1/leu2-<math>\Delta</math>1 his3-<math>\Delta</math>200/his3-<math>\Delta</math>200 trp1-<math>\Delta</math>63 /trp1-<math>\Delta</math>63</i>       | This study            |
| yJM1346             | <i>MAT<math>\alpha</math>/<math>\alpha</math> tub1-N103D-GFP::LEU2/TUB1 ura3-52/ura3-52 lys2-801/lys2-801 leu2-<math>\Delta</math>1/leu2-<math>\Delta</math>1 his3-<math>\Delta</math>200/his3-<math>\Delta</math>200 trp1-<math>\Delta</math>63 /trp1-<math>\Delta</math>63</i>                   | This study            |
| yJM1347             | <i>MAT<math>\alpha</math>/<math>\alpha</math> tub1-N103D-GFP::LEU2/TUB1 ura3-52/ura3-52 lys2-801/lys2-801 leu2-<math>\Delta</math>1/leu2-<math>\Delta</math>1 his3-<math>\Delta</math>200/his3-<math>\Delta</math>200 trp1-<math>\Delta</math>63 /trp1-<math>\Delta</math>63</i>                   | This study            |
| yJM1348             | <i>MAT<math>\alpha</math>/<math>\alpha</math> tub1-N103D-GFP::LEU2/tub1-N103D+280::KanMX6 ura3-52/ura3-52 lys2-801/lys2-801 leu2-<math>\Delta</math>1/leu2-<math>\Delta</math>1 his3-<math>\Delta</math>200/his3-<math>\Delta</math>200 trp1-<math>\Delta</math>63 /trp1-<math>\Delta</math>63</i> | This study            |
| yJM1349             | <i>MAT<math>\alpha</math>/<math>\alpha</math> tub1-N103D-GFP::LEU2/tub1-N103D+280::KanMX6 ura3-52/ura3-52 lys2-801/lys2-801 leu2-<math>\Delta</math>1/leu2-<math>\Delta</math>1 his3-<math>\Delta</math>200/his3-<math>\Delta</math>200 trp1-<math>\Delta</math>63 /trp1-<math>\Delta</math>63</i> | This study            |
| yJM1671             | <i>MAT<math>\alpha</math> tub1-N103D+280::KanMX BIK1-3GFP::TRP1 ura3-52 lys2-801 leu2-<math>\Delta</math>1 his3-<math>\Delta</math>200 trp1-<math>\Delta</math>63</i>                                                                                                                              | This study            |
| yJM1672             | <i>MAT<math>\alpha</math> tub1-N103D+280::KanMX tub3-N103D+150::hygB BIK1-3GFP::TRP1 ura3-52 lys2-801 leu2-<math>\Delta</math>1 his3-<math>\Delta</math>200 trp1-<math>\Delta</math>63</i>                                                                                                         | This study            |
| yJM1673             | <i>MAT<math>\alpha</math> tub1-N103D+280::KanMX BIK1-3GFP::TRP1 ura3-52 lys2-801 leu2-<math>\Delta</math>1 his3-<math>\Delta</math>200 trp1-<math>\Delta</math>63</i>                                                                                                                              | This study            |
